# Supplementary material
Source: PubMed Central journal article supplement (PMC3589109)
Supplement: NIHMS445530-supplement-01.pdf [file NIHMS445530-supplement-01.pdf]

DOI: 10.1038/ncb2578

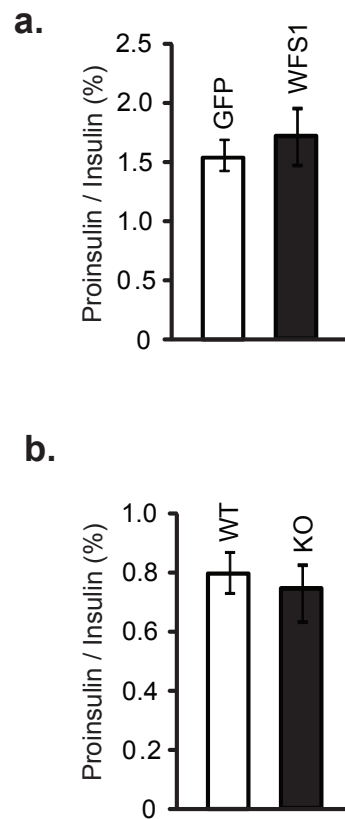

**Figure S1** WFS1 does not modulate insulin processing. **a.** The ratio of proinsulin to insulin release was measured in rat islets transduced with GFP or WFS1 lentivirus and treated for 2 hr with 16.7 mM glucose (n=3). **b.** The

ratio of proinsulin to insulin release was measured in islets from *Wfs1*<sup>+/+</sup> (WT) and *Wfs1*<sup>-/-</sup> (KO) mice and treated for 2 hr with 16.7 mM glucose (n=3). Data are means  $\pm$  SD.

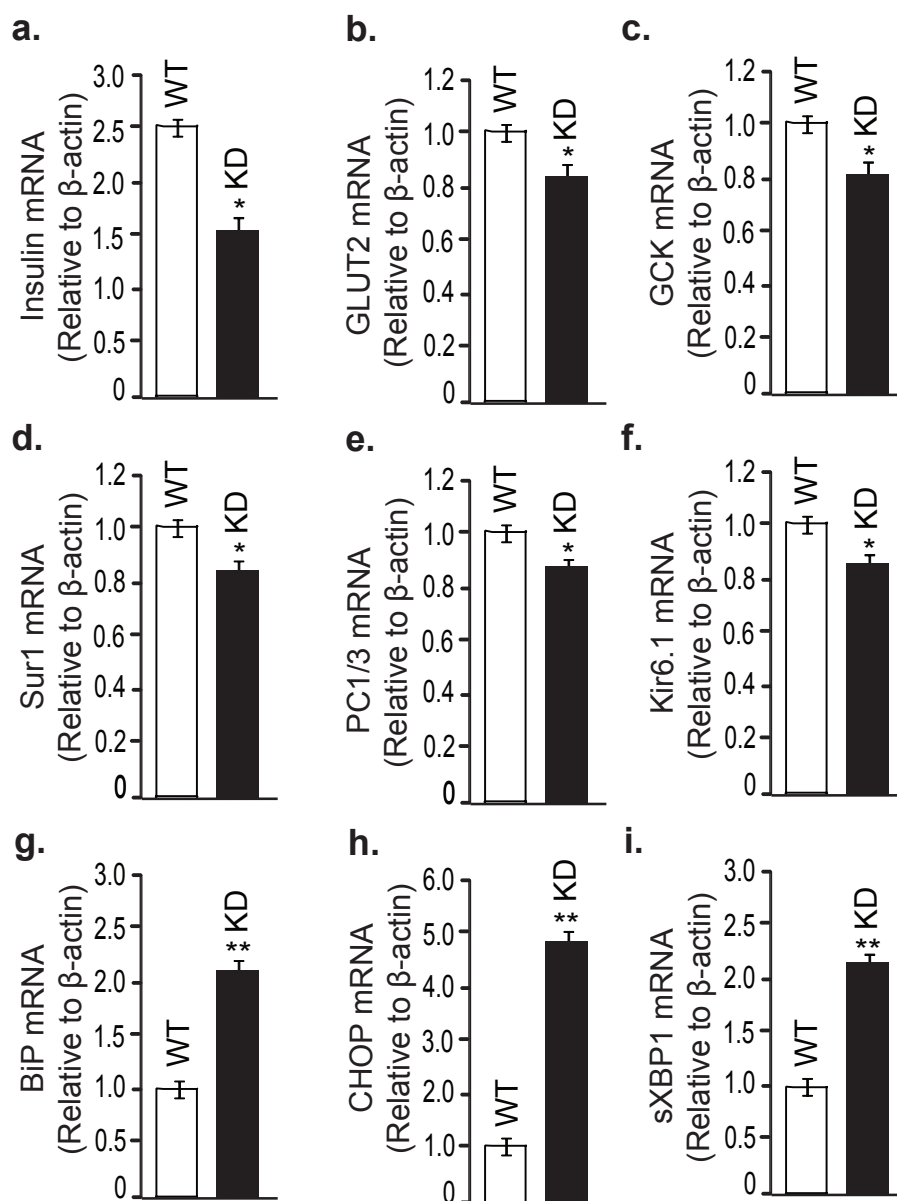

**Figure S2** Glucose sensing genes are suppressed in WFS1 knockdown cells. **a-i**, Total mRNA was prepared from INS-1 832/13 pTetR with endogenous WFS1 (WT) or suppression of endogenous WFS1 with shRNA (KD) ( $n = 3$ ). Relative expression levels of insulin (**a**), glucose transporter 2 (GLUT2) (**b**), glucokinase (GCK) (**c**), sulfonylurea receptor 1 (Sur1) (**d**), prohormone

convertase (PC1/3) (**e**), potassium inwardly rectifying K channel subunit (Kir6.1) (**f**), immunoglobulin heavy chain-binding protein (BiP) (**g**), C/EBP homologous protein (CHOP) (**h**), and spliced X box-binding protein 1 (sXBP1) (**i**) were measured by qPCR ( $n = 3$ ). Data are means  $\pm$  SD. \* $p < 0.05$ , \*\* $p < 0.01$ .

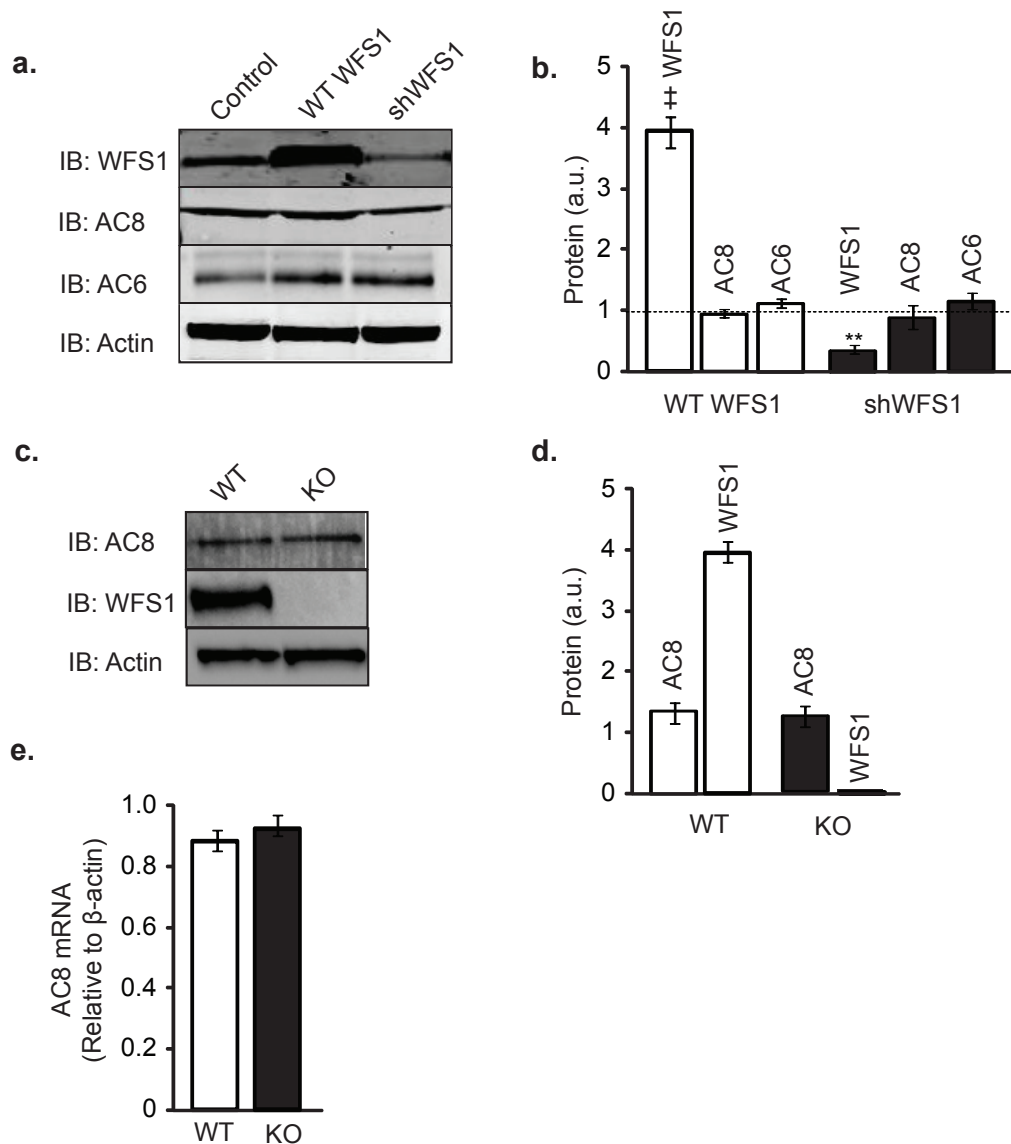

**Figure S3** WFS1 does not regulate adenylyl cyclase 6 (AC6) or 8 (AC8) expression. **a**, Lysates from INS-1 832/13 pTetR cells with endogenous WFS1 expression (Control), overexpression of WFS1 (WT WFS1), and suppression of endogenous WFS1 (shWFS1) were immunoblotted (IB) with the following antibodies: anti-WFS1, anti-AC8, anti-AC6, and anti-actin. **b**, Protein levels of WT WFS1 and shWFS1 samples were quantified using

ImageJ and normalized to control (dotted line) ( $n = 3$ ) **c**, Lysates from *Wfs1*<sup>+/+</sup> (WT) and *Wfs1*<sup>-/-</sup> (KO) islets were IB with the following antibodies: anti-WFS1, anti-AC8, and anti-actin. **d**, Protein levels of WT and KO samples were quantified using ImageJ ( $n = 3$ ). **e**, Relative mRNA expression of AC8 was measured by qPCR in WT and KO islets ( $n = 3$ ). Data are means  $\pm$  SD. \*\* $p < 0.01$ , †  $p < 0.001$ .

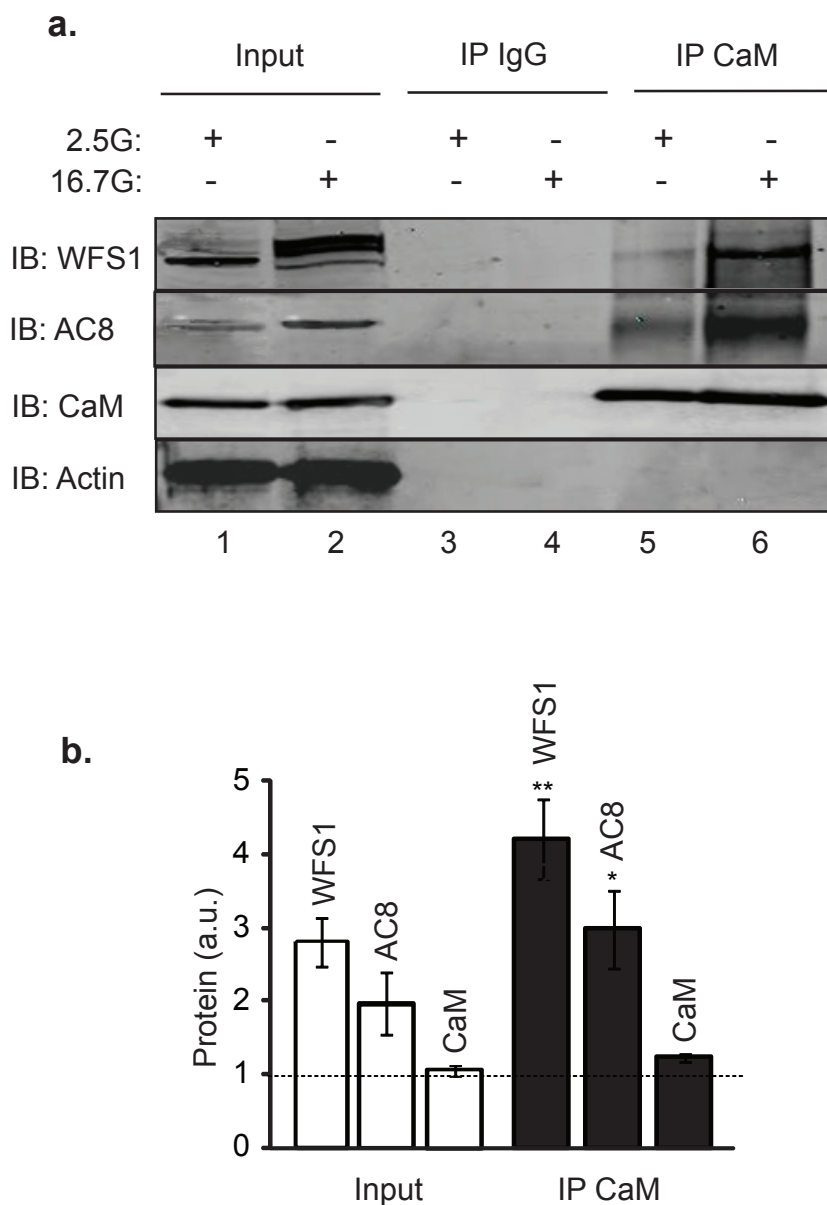

**Figure S4** WFS1 forms a glucose-dependent complex with adenylyl cyclase 8 (AC8) and calmodulin (CaM). **a.** CaM was immunoprecipitated (IP) from cell lysates prepared from INS-1 832/13 cells treated with 2.5mM (2.5G) or 16.7 mM glucose (16.7G) for 2 hr. Immunoprecipitates were immunoblotted

(IB) with anti-WFS1, anti-AC8, anti-CaM, and anti-actin antibodies. **b.** Protein levels of samples treated with 16.7G in (a) were quantified using ImageJ and normalized to 2.5G samples (dotted line) (n = 3). Data are means  $\pm$  SD. \*p<0.05, \*\*p<0.01.

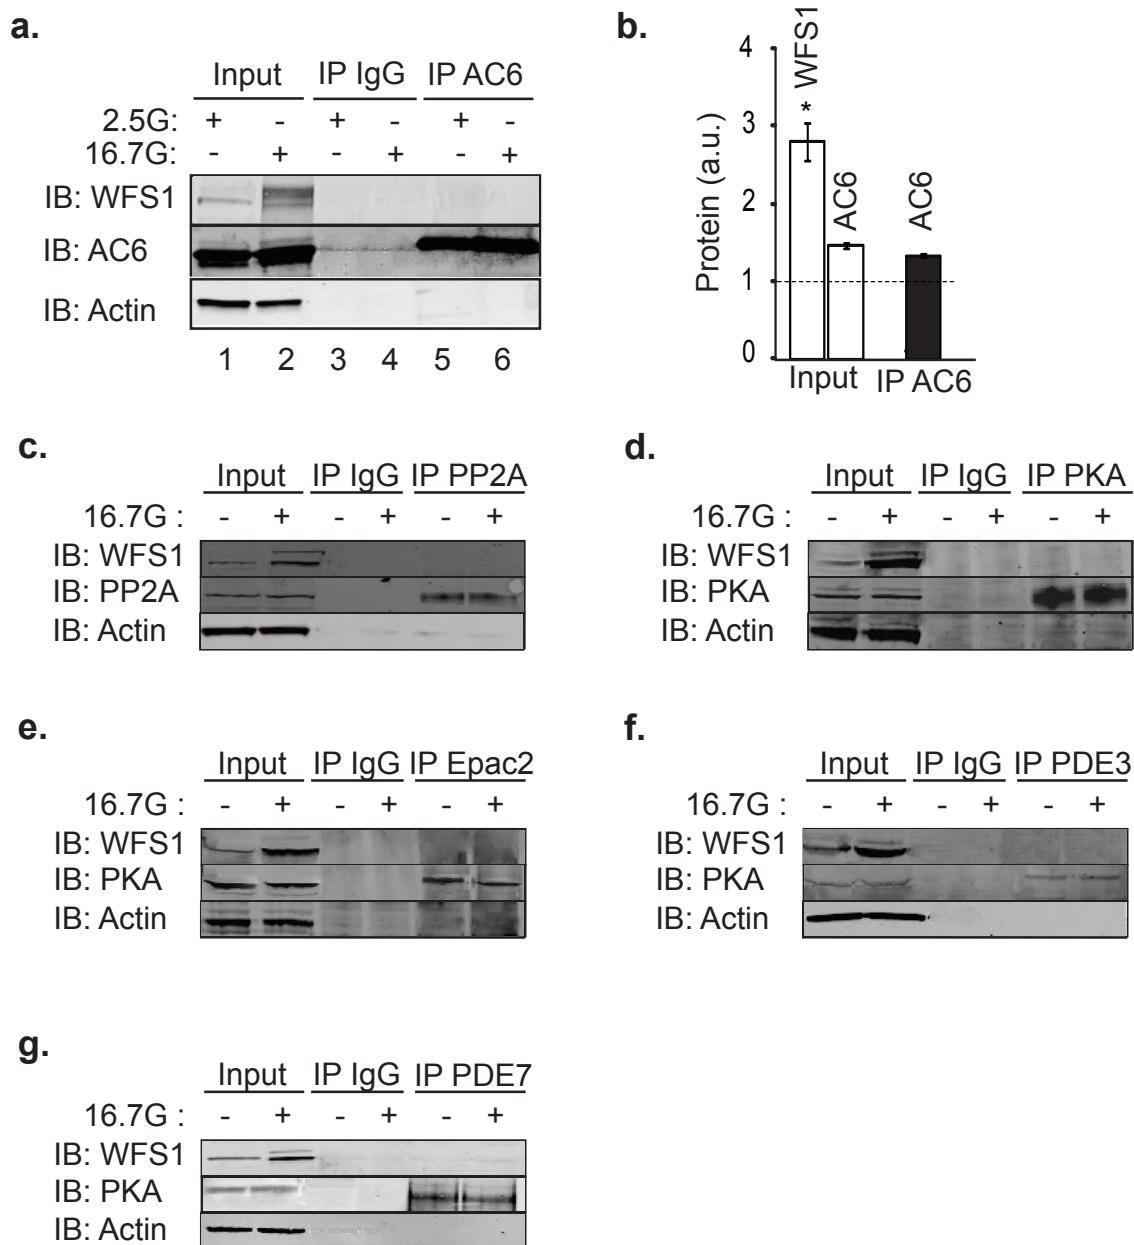

**Figure S5** WFS1 does not form a complex with adenylyl cyclase 6 (AC6) or other cAMP pathway proteins **a**, AC6 was immunoprecipitated (IP) from cell lysates prepared from INS1 832/13 treated with 2.5 mM (2.5G) or 16.7 mM glucose (16.7G) for 1 hr. Immunoprecipitates were immunoblotted with anti-WFS1, anti-AC6, and anti-actin antibodies. **b**, Quantification of input and IP proteins (bars) from (a) as a fold increase from 2.5G (dotted line) **c**, Protein phosphatase 2A (PP2A) was immunoprecipitated (IP) from cell lysates prepared from INS-1 832/13 cells, treated with 2.5 mM or 16.7 mM glucose (16.7G) for 2 hr. Immunoprecipitates were immunoblotted (IB) with anti-WFS1, anti-PP2A, and anti-actin antibodies. **d**, Protein kinase A (PKA) was

IP from INS-1 832/13 cell lysates prepared as in (a). Immunoprecipitates were IB with anti-WFS1, anti-PKA, and anti-actin antibodies. **e**, Exchange protein directly activated by cAMP 2 (Epac2) was IP from INS-1 832/13 cell lysates prepared as in (a). Immunoprecipitates were IB with anti-WFS1, anti-Epac2, and anti-actin antibodies. **f**, Phosphodiesterase 3B (PDE3) was IP from INS-1 832/13 cell lysates prepared as in (a). Immunoprecipitates were IB with anti-WFS1, anti-PDE3, and anti-actin antibodies. **g**, Phosphodiesterase 7 (PDE7) was IP from INS-1 832/13 cell lysates prepared as in (a). Immunoprecipitates were IB with anti-WFS1, anti-PDE7, and anti-actin antibodies (n=3). Data are means  $\pm$  SD. \* $p < 0.05$ .

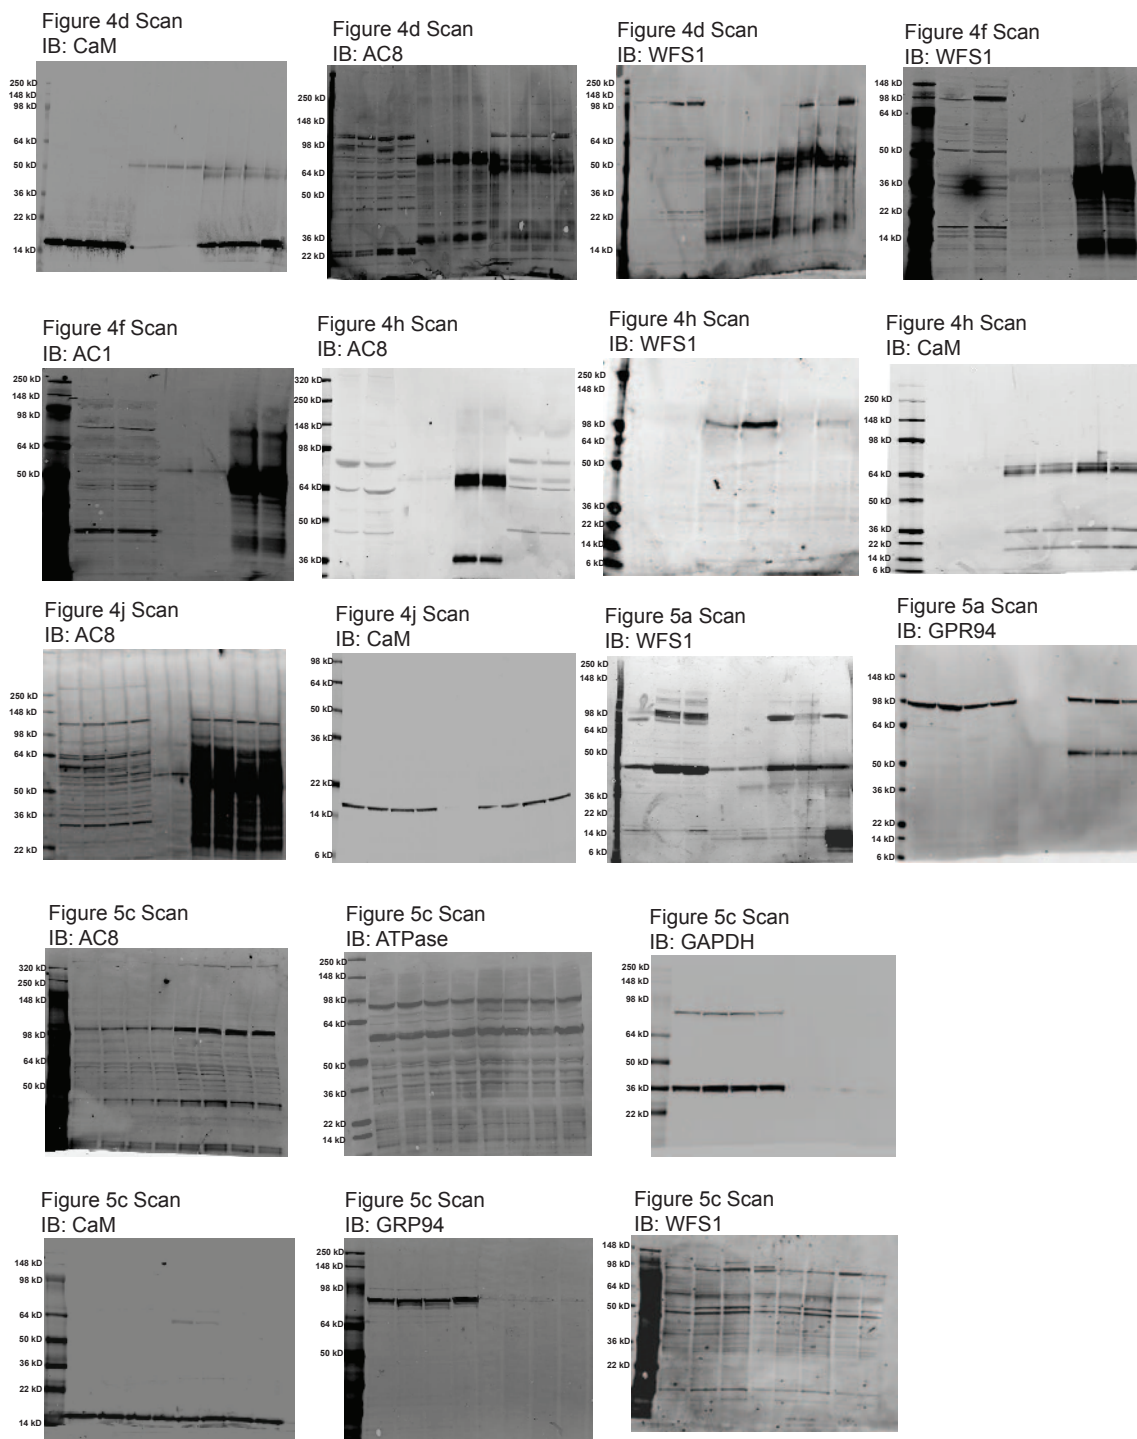

Figure S6. Full blot scans. Full immunoblot scans for Fig. 4d, 4f, 4h, 4j, 5a, and 5c.
